# Supplementary material for: Au10Ag17(TPP)10(SR)6Cl5nanocluster: structure, transformation and the origin of its photoluminescence
Source: Royal Society of Chemistry journal article supplement (doi:10.1039/d3cp00459g), 2023-01-01
Supplement: d3cp00459g1.pdf [file d3cp00459g1.pdf]

## Supporting Information

### **Au<sub>10</sub>Ag<sub>17</sub>(TPP)<sub>10</sub>(SR)<sub>6</sub>Cl<sub>5</sub> Nanocluster: Structure, Transformation and the Origin of its Photoluminescence**

Along Ma,<sup>a</sup> Jiawei Wang,<sup>a</sup> Jie Kong,<sup>b</sup> Yonggang Ren,<sup>a</sup> Yuxuan Wang,<sup>a</sup> Xiaoshuang Ma,<sup>a</sup> Meng Zhou,<sup>b,\*</sup> and Shuxin Wang<sup>a,\*</sup>

<sup>a</sup> College of Materials Science and Engineering, Qingdao University of Science and Technology, Qingdao, Shandong 266042, P. R. China

<sup>b</sup> Hefei National Research Center for Physical Sciences at the Microscale, Department of Chemical Physics, University of Science and Technology of China, Hefei, Anhui 230026, P. R. China

\*Corresponding authors. E-mail: [shuxin\\_wang@qust.edu.cn](mailto:shuxin_wang@qust.edu.cn) (Shuxin Wang), [mzhou88@ustc.edu.cn](mailto:mzhou88@ustc.edu.cn) (Meng Zhou);

Notes: The authors declare no competing financial interest.

This Supporting Information includes:

Experimental

Characterization

Supplementary Figures S1-S21

## Experimental

### Chemicals

All reagents were commercially available and used without further purification. Tetrachloroauric(III) acid ( $\text{HAuCl}_4 \cdot 3\text{H}_2\text{O}$ , 99.99% metal basis), silver nitrate ( $\text{AgNO}_3$ , 98% metals basis), phenylethyl mercaptan ( $\text{HSCH}_2\text{CH}_2\text{Ph}$ , 99%), 3,5-bis(trifluoromethyl)thiophenol ( $\text{HSPh}^{3,5}\text{-R}_2$ ,  $\text{R} = \text{CF}_3$ , 99%), triphenylphosphine ( $\text{PPh}_3$ , 98.8%), sodium borohydride ( $\text{NaBH}_4$ , 98%), sodium hexafluoroantimonate ( $\text{NaSbF}_6$ , 98%), triethylamine ( $\text{Et}_3\text{N}$ , 98%), rhodamine b (RhB, 99%), perylene ( $\text{C}_{20}\text{H}_{12}$ , 99%), rubrene ( $\text{C}_{42}\text{H}_{28}$ , 99%), acetonitrile ( $\text{CH}_3\text{CN}$ , HPLC grade), ethanol ( $\text{EtOH}$ , HPLC grade), dichloromethane (DCM, HPLC grade), diethyl ether ( $\text{C}_2\text{H}_5\text{OC}_2\text{H}_5$ , HPLC grade), tetrahydrofuran (THF, HPLC grade), 2-methyltetrahydrofuran (2-MeTHF, HPLC grade) and n-hexane (Hex, HPLC grade), were purchased from Sigma-Aldrich.

### Synthesis of $\text{Au}_{10}\text{Ag}_{17}(\text{TPP})_{10}(\text{SR})_6\text{Cl}_5$ nanocluster

Typically,  $\text{HAuCl}_4 \cdot 3\text{H}_2\text{O}$  (0.20 g/mL, 250  $\mu\text{L}$ , 0.13 mmol) and  $\text{AgNO}_3$  (25 mg, 0.15 mmol, dissolved in 2 mL of  $\text{H}_2\text{O}$ ) were added to the 15 mL of ethanol and 5 mL of  $\text{CH}_2\text{Cl}_2$  under vigorous stirring. After stirring for 5 min,  $\text{PPh}_3$  (200 mg, 0.76 mmol) and  $\text{HSPh}(\text{CF}_3)_2$  (32  $\mu\text{L}$ , 0.18 mmol) were added to the reaction. After 30 min, the reaction solution turned colorless and transparent. Next, a freshly prepared solution of  $\text{NaBH}_4$  (30 mg, 0.79 mmol, dissolved in 2 mL of  $\text{H}_2\text{O}$ ) was added, and the solution gradually changed to dark. The reaction lasted 18 h at room temperature and finally the  $\text{Au}_{10}\text{Ag}_{17}$  nanocluster was produced (yield ~20 %, Au atom basis). After that, in order to obtain the pure  $\text{Au}_{10}\text{Ag}_{17}$  nanoclusters, the solution was centrifuged, and the crude product was dissolved in ethanol (50 mL) and stored in a refrigerator (4 °C) for several months. The supernatant was collected by centrifugation. And the crude product was washed with n-hexane three times to get the  $\text{Au}_{10}\text{Ag}_{17}$  nanocluster. Black, block-shaped crystals were acquired by crystallizing the pure nanoclusters in DCM/Hex (1 : 3) after ~2 weeks at room temperature.

### Conversion from $\text{Au}_{10}\text{Ag}_{17}(\text{TPP})_{10}(\text{SR})_6\text{Cl}_5$ nanocluster to $[\text{Au}_{12}\text{Ag}_{13}(\text{TPP}_3)_{10}(\text{PET})_5\text{Cl}_2]^{2+}$ nanocluster

The  $\text{Au}_{10}\text{Ag}_{17}$  (10 mg) and PET (100  $\mu\text{L}$ ) were dissolved in 20 mL of  $\text{CH}_2\text{Cl}_2$  under vigorous stirring. After 3 min,  $\text{Au}_{10}\text{Ag}_{17}$  were converted into the  $\text{Au}_{12}\text{Ag}_{13}$  (yield ~30 %, Au atom basis), then  $\text{CH}_3\text{CN}$  was added to stop the reaction.  $\text{Au}_{12}\text{Ag}_{13}$  was obtained by crystallizing the nanoclusters in DCM/ $\text{C}_2\text{H}_5\text{OC}_2\text{H}_5$  (1 : 3) after 3 days.

## Characterization

Ultraviolet-visible absorption spectra in this study were recorded on a Shanghai Metash UV-8000 spectrophotometer. All samples were dissolved in DCM or 2-MeTHF for spectrum measurements.

The X-ray photoelectron spectroscopy (XPS) measurements were performed on ESCALAB XI+ configured with a monochromated  $\text{Al}_{\text{K}\alpha}$  (1486.8 eV) 150W X-ray source, 0.5 mm circular spot size, a flood gun to counter charging effects, and the analysis chamber base pressure lower than  $1 \times 10^{-9}$  mbar, data were collected with  $\text{FAT} = 20$  eV.

Photoluminescence (PL) spectra of the solutions of clusters were carried out on HITACHI F-4600 PL spectrophotometer. The PLQY of  $\text{Au}_{10}\text{Ag}_{17}$  was calculated with  $\text{Ag}_{25}(\text{SPh}^{2,4}\text{Me}_2)_{18}$  (PLQY=0.6%, DCM)

as the reference. And the PLQY of  $\text{Au}_{12}\text{Ag}_{13}$  was calculated with RhB (PLQY=70%, EtOH) as the reference at room temperature.

Temperature-dependent PL spectra and UV-vis absorption spectra of clusters were carried out on NOVA Laboratory Spectrometer of ideaoptics.

Single-crystal X-ray diffraction (SC-XRD) datas of the  $\text{Au}_{10}\text{Ag}_{17}$  and  $\text{Au}_{12}\text{Ag}_{13}$  nanoclusters were collected on a Xtalab Synergy diffractometer at 170 K, using Mo-K $\alpha$  radiation ( $\lambda = 1.54186 \text{ \AA}$ ). With the help of Olex2, the structure was solved with the ShelXT structure solution program.

The fs-TA experiment was performed on a home-built setup based on a commercial amplified Ti:sapphire laser (Coherent, Astrella, 1 KHz, 7 mJ). The ns-TA experiment was performed on a commercial setup (Nano100, Time-Tech Spectra) using the same fs laser as the pump.

## Supplementary Figures

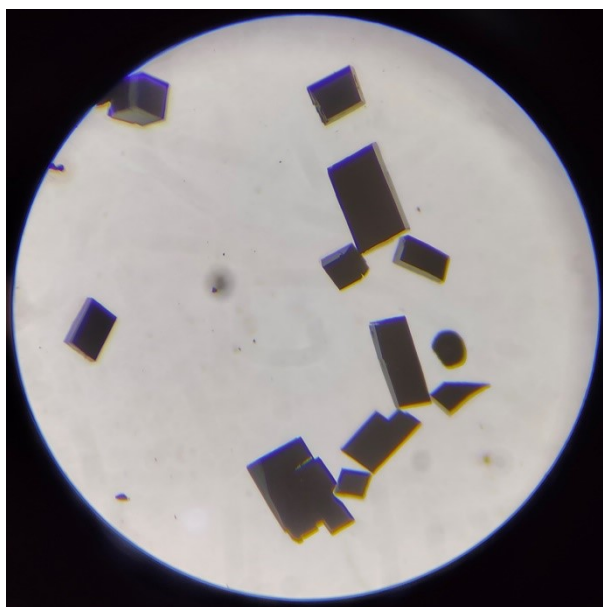

**Fig. S1** An optical microscopic image of the single crystals of  $\text{Au}_{10}\text{Ag}_{17}$  nanoclusters, which are grown by the vapor diffusion of n-hexane into a concentrated  $\text{CH}_2\text{Cl}_2$  solution of the nanocluster.

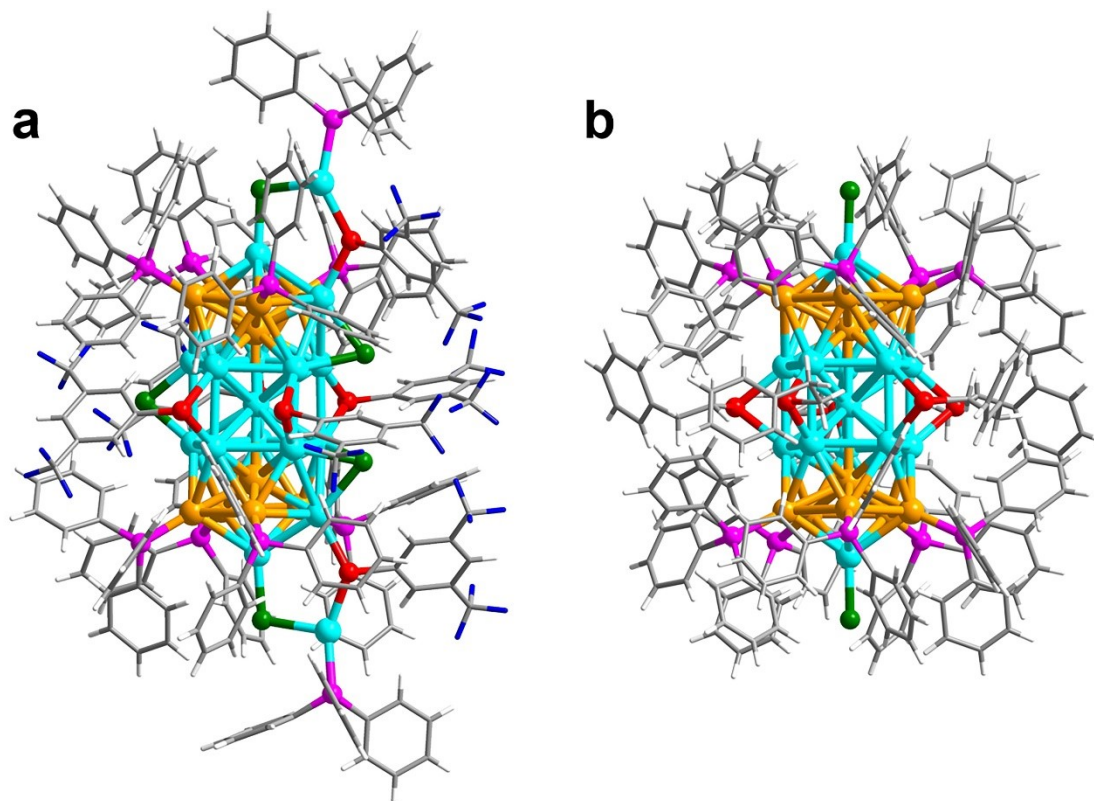

**Fig. S2** The overall structure of the  $\text{Au}_{10}\text{Ag}_{17}$  and  $\text{Au}_{12}\text{Ag}_{13}$  nanoclusters. (a)  $\text{Au}_{10}\text{Ag}_{17}$ . (b)  $\text{Au}_{12}\text{Ag}_{13}$ . Color labels: orange = Au; light blue = Ag; green = Cl; red = S; magenta = P; blue = F; grey = C; white = H.

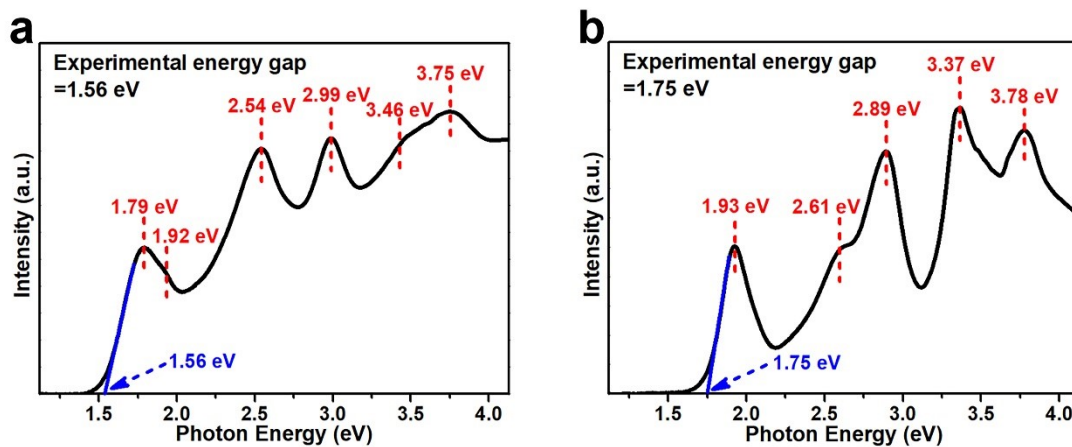

**Fig. S3** UV-vis absorption spectra (photon energy scale) of the  $\text{Au}_{10}\text{Ag}_{17}$  and  $\text{Au}_{12}\text{Ag}_{13}$  nanoclusters in  $\text{CH}_2\text{Cl}_2$ . (a)  $\text{Au}_{10}\text{Ag}_{17}$ . (b)  $\text{Au}_{12}\text{Ag}_{13}$ . The experimental energy gap of the  $\text{Au}_{10}\text{Ag}_{17}$  and  $\text{Au}_{12}\text{Ag}_{13}$  nanoclusters in  $\text{CH}_2\text{Cl}_2$  was determined as  $\sim 1.56$  eV and 1.75 eV, respectively.

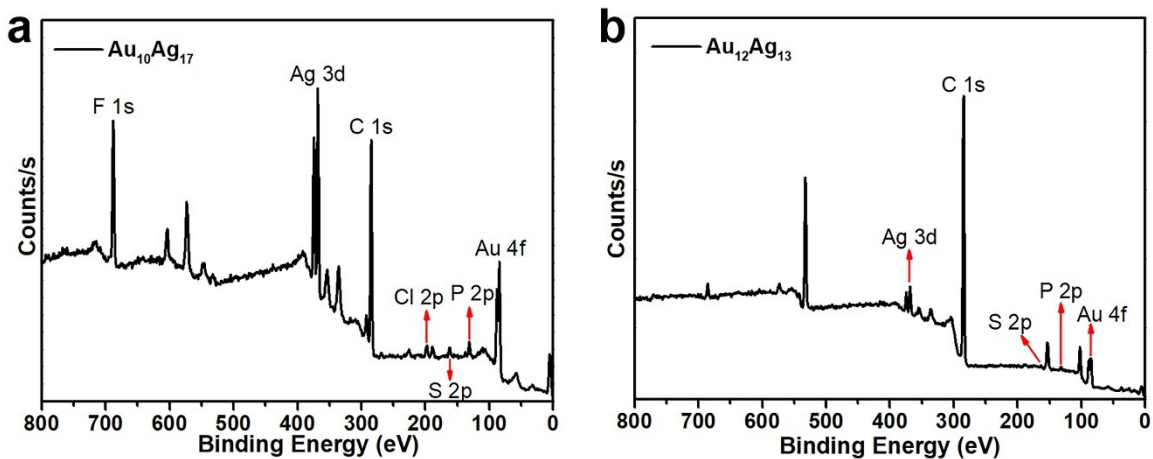

**Fig. S4** XPS spectra of the  $\text{Au}_{10}\text{Ag}_{17}$  and  $\text{Au}_{12}\text{Ag}_{13}$  nanoclusters. (a) Survey data of  $\text{Au}_{10}\text{Ag}_{17}$  nanocluster. (b) Survey data of  $\text{Au}_{12}\text{Ag}_{13}$  nanocluster.

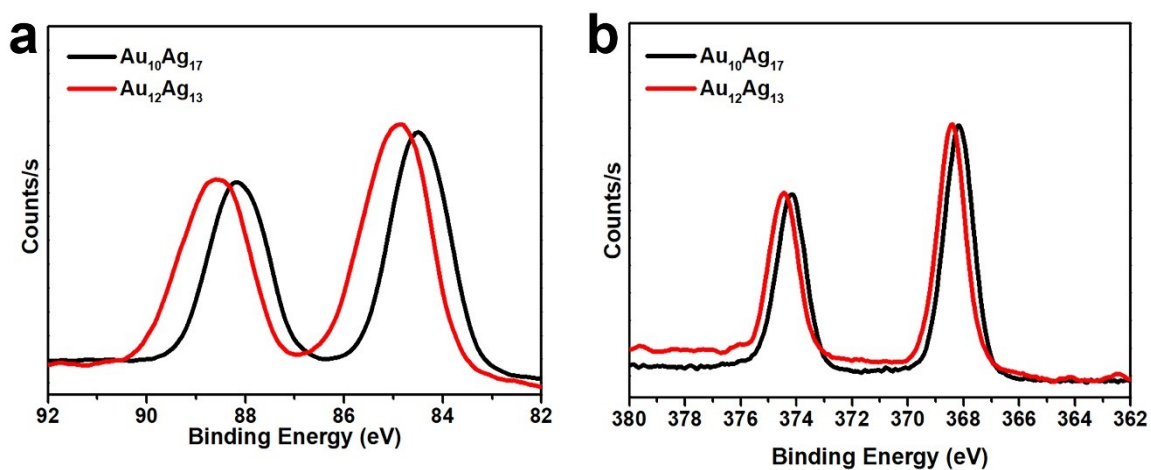

**Fig. S5** XPS spectra of the  $\text{Au}_{10}\text{Ag}_{17}$  and  $\text{Au}_{12}\text{Ag}_{13}$  nanoclusters. (a) Au 4f. (b) Ag 3d.

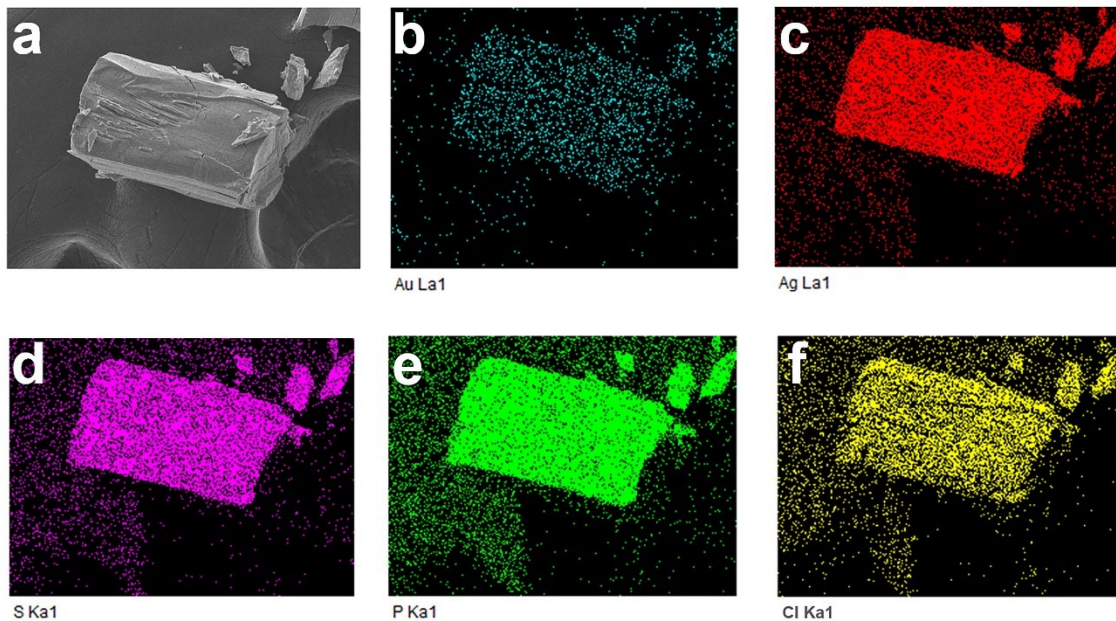

**Fig. S6 .** (a) SEM image of a small deformed single crystal of  $\text{Au}_{10}\text{Ag}_{17}$ . (b)-(f) Elemental mapping images of Au, Ag, S, P and Cl, respectively.

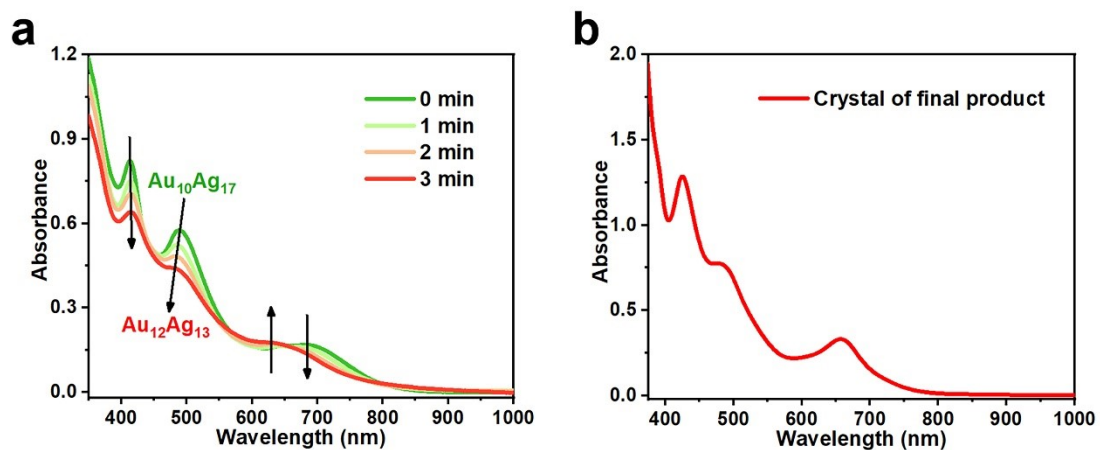

**Fig. S7** (a) Time-dependent optical absorptions of the conversion of  $\text{Au}_{10}\text{Ag}_{17}$  to  $\text{Au}_{12}\text{Ag}_{13}$ . (b) The crystal UV-vis absorption spectrum of final product ( $\text{Au}_{12}\text{Ag}_{13}$  nanocluster).



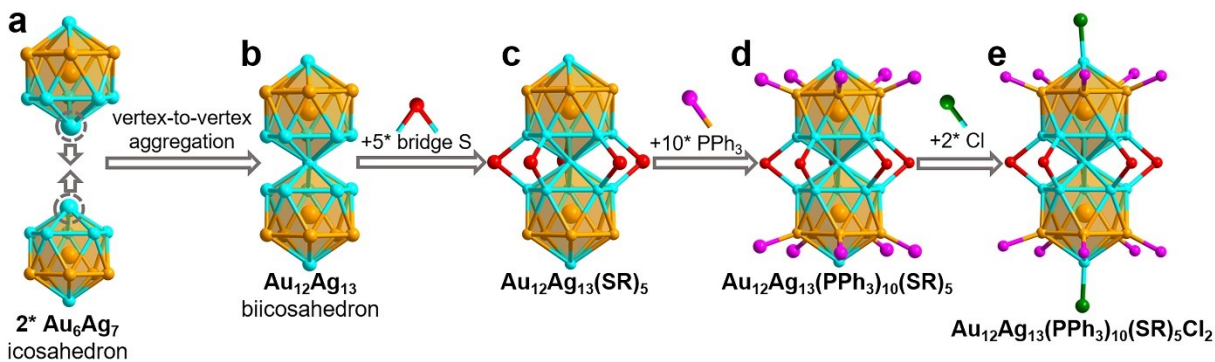

**Fig. S8** Structural anatomy of the  $\text{Au}_{12}\text{Ag}_{13}$  nanocluster. (a) The mono-icosahedral  $\text{Au}_6\text{Ag}_7$  unit. (b) The biicosahedral  $\text{Au}_{12}\text{Ag}_{13}$  kernel. (c) The  $\text{Au}_{12}\text{Ag}_{13}(\text{SR})_5$  structure with five waist SR ligands. (d) The  $\text{Au}_{12}\text{Ag}_{13}(\text{PPh}_3)_{10}(\text{SR})_5$  structure with ten shoulder  $\text{PPh}_3$  ligands. (e) The  $\text{Au}_{12}\text{Ag}_{13}(\text{PPh}_3)_{10}(\text{SR})_5\text{Cl}_2$  with two vertex Cl ligands. Color labels: orange = Au; light blue = Ag; green = Cl; red = S; magenta = P. All C and H atoms are omitted for clarity.

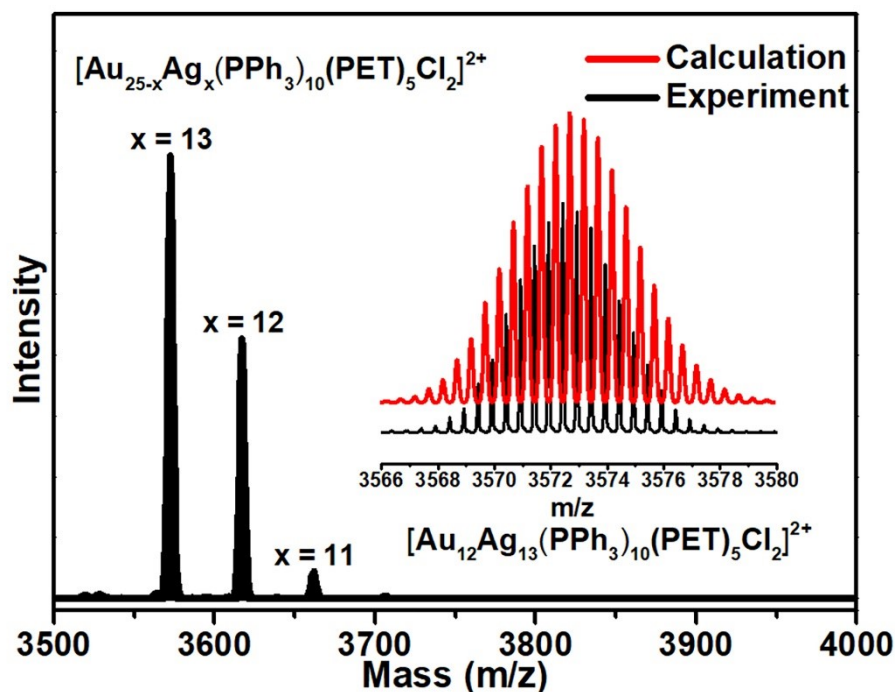

**Fig. S9** ESI-MS results of the final product ( $\text{Au}_{12}\text{Ag}_{13}$  nanocluster).

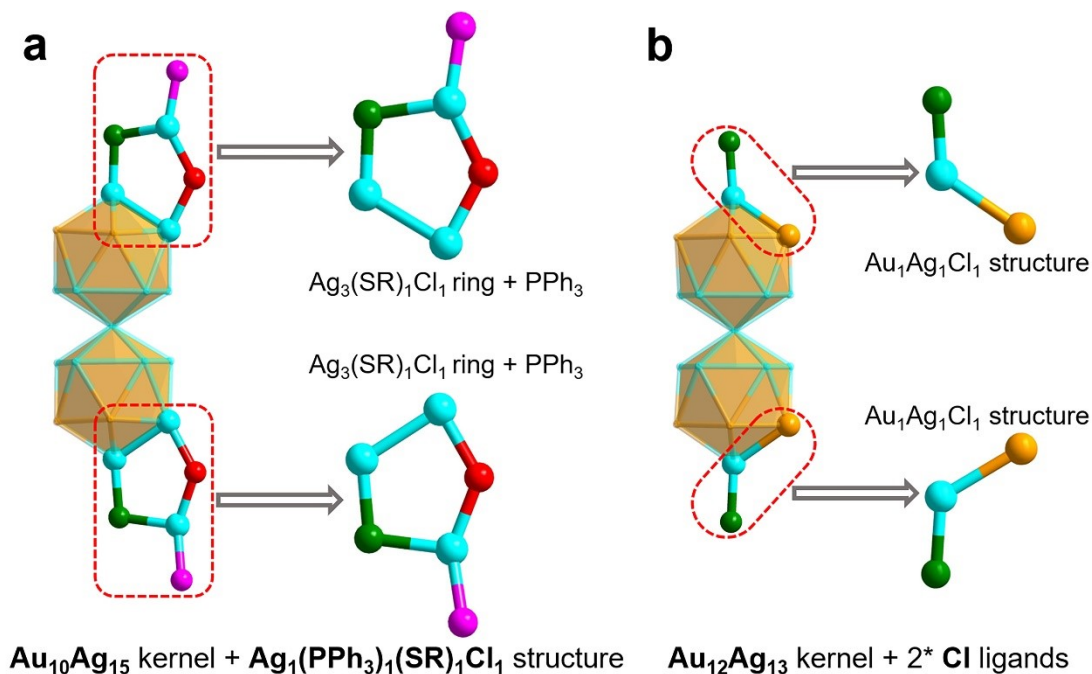

**Fig. S10** Different surface structure between vertex Ag and shoulder Ag/Au in the  $\text{Au}_{10}\text{Ag}_{17}$  and  $\text{Au}_{12}\text{Ag}_{13}$  nanoclusters. (a) The  $\text{Ag}_1(\text{PPh}_3)_1(\text{SR})_1\text{Cl}_1$  surface structure between vertex Ag and shoulder Ag in the  $\text{Au}_{10}\text{Ag}_{17}$  nanocluster. (b) The  $\text{Au}_1\text{Ag}_1\text{Cl}_1$  structure in  $\text{Au}_{12}\text{Ag}_{13}$  nanocluster. Color labels: orange = Au; light blue = Ag; green = Cl; red = S; magenta = P.

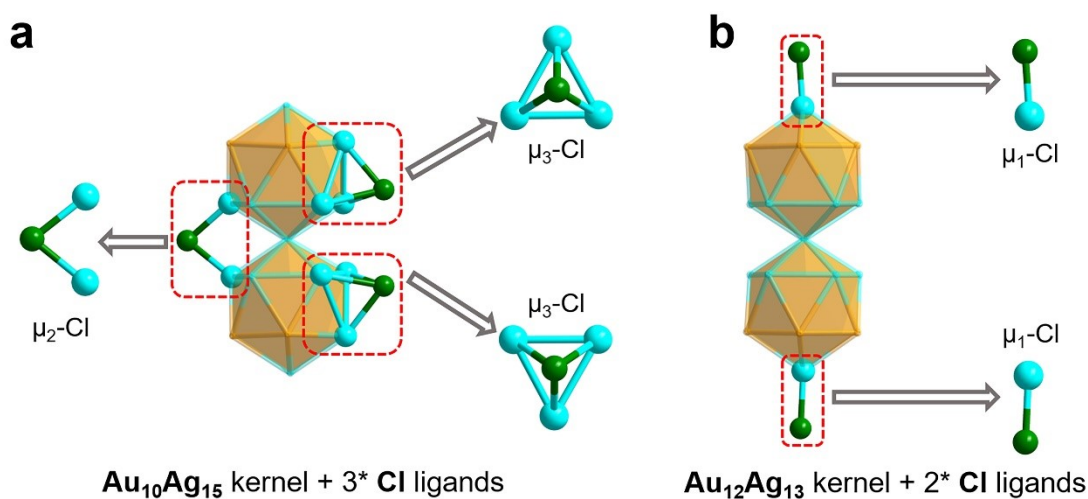

**Fig. S11** Bridging mode of Cl in the  $\text{Au}_{10}\text{Ag}_{17}$  and  $\text{Au}_{12}\text{Ag}_{13}$  nanoclusters. (a) Bonding between three Cl ligands and the  $\text{Au}_{10}\text{Ag}_{15}$  kernel in  $\text{Au}_{10}\text{Ag}_{17}$  nanocluster. (b) Bonding between two Cl ligands and the  $\text{Au}_{12}\text{Ag}_{13}$  kernel in  $\text{Au}_{12}\text{Ag}_{13}$  nanocluster. Color labels: orange = Au; light blue = Ag; green = Cl.



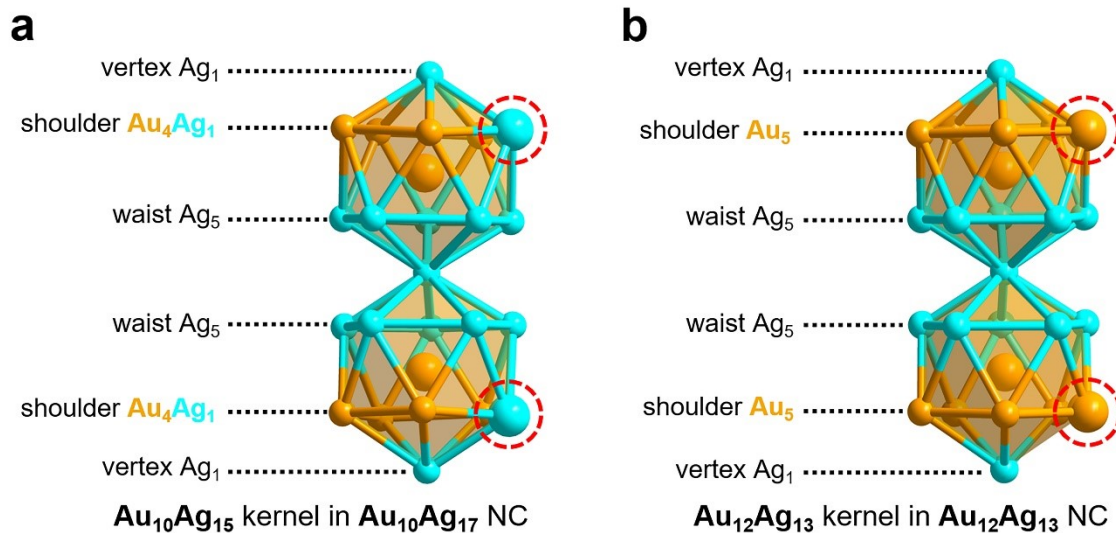

**Fig. S12**  $M_{25}$  biicosahedral kernel in the  $\text{Au}_{10}\text{Ag}_{17}$  and  $\text{Au}_{12}\text{Ag}_{13}$  nanoclusters. (a)  $\text{Au}_{10}\text{Ag}_{15}$  kernel in  $\text{Au}_{10}\text{Ag}_{17}$  nanocluster. (b)  $\text{Au}_{12}\text{Ag}_{13}$  kernel in  $\text{Au}_{12}\text{Ag}_{13}$  nanocluster. Color labels: orange = Au; light blue = Ag.

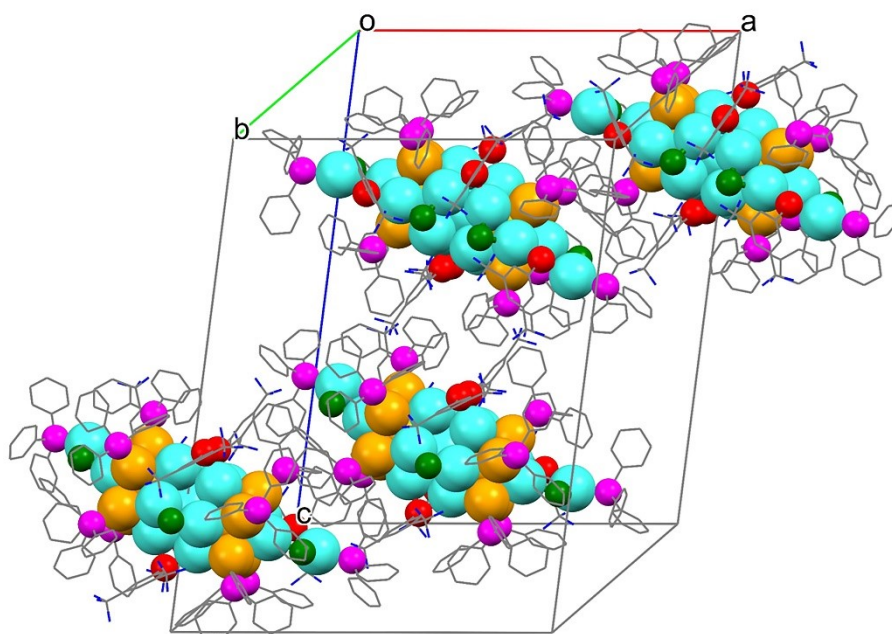

**Fig. S13** A unit cell in the  $\text{Au}_{10}\text{Ag}_{17}$  single crystal. Color labels: orange = Au; light blue = Ag; green = Cl; red = S; magenta = P; blue = F; grey = C. All H atoms are omitted for clarity.

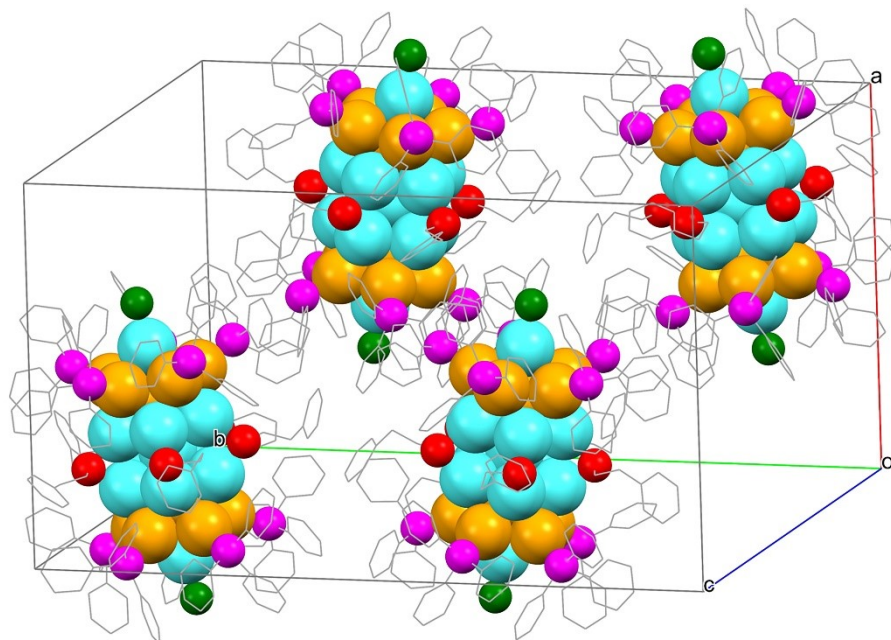

**Fig. S14** A unit cell in the  $\text{Au}_{12}\text{Ag}_{13}$  single crystal. Color labels: orange = Au; light blue = Ag; green = Cl; red = S; magenta = P; grey = C. All H atoms are omitted for clarity.

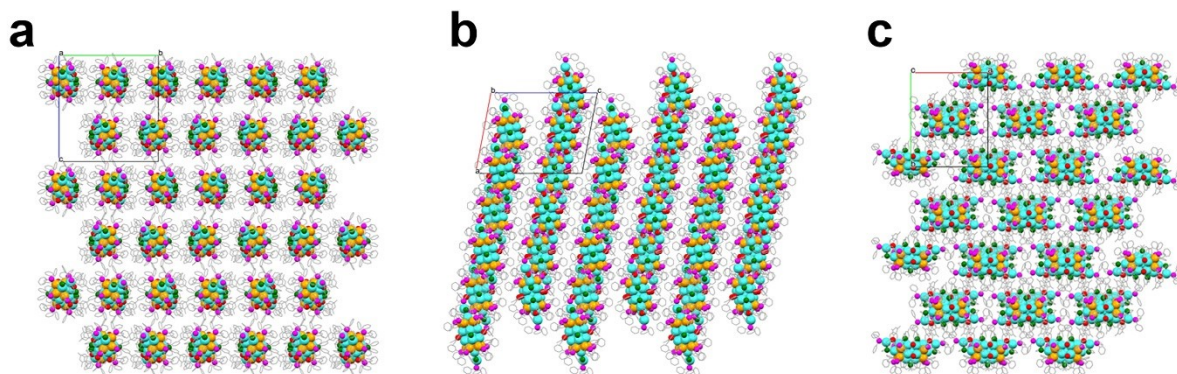

**Fig. S15** Packing mode of the  $\text{Au}_{10}\text{Ag}_{17}$  in the crystal shown. (a) Along the a axis, (b) Along the b axis, (c) Along the c axis. Color labels: orange = Au; light blue = Ag; green = Cl; red = S; magenta = P; grey = C. All H and F atoms are omitted for clarity.

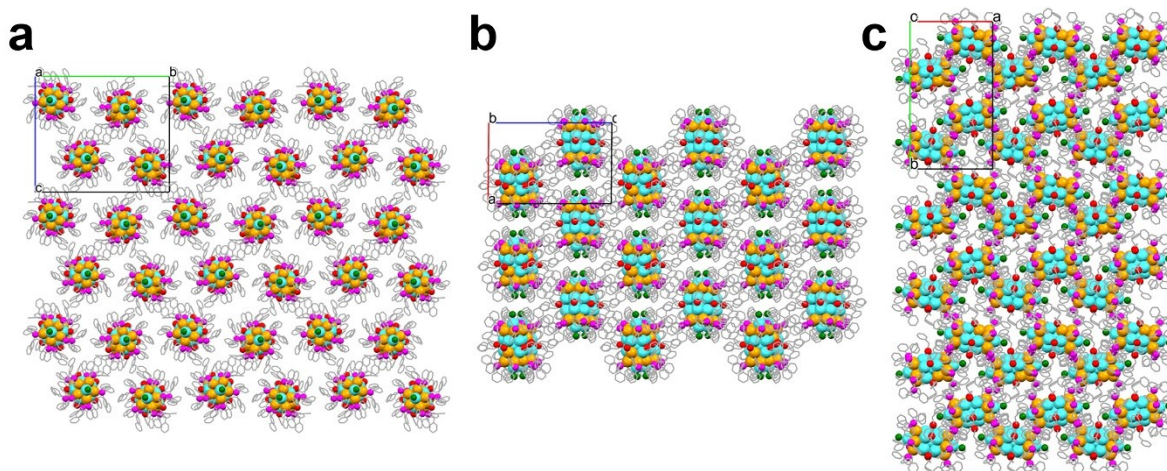

**Fig. S16** Packing mode of the  $\text{Au}_{12}\text{Ag}_{13}$  in the crystal shown. (a) Along the a axis, (b) Along the b axis, (c) Along the c axis. Color labels: orange = Au; light blue = Ag; green = Cl; red = S; magenta = P; grey = C. All H atoms are omitted for clarity.

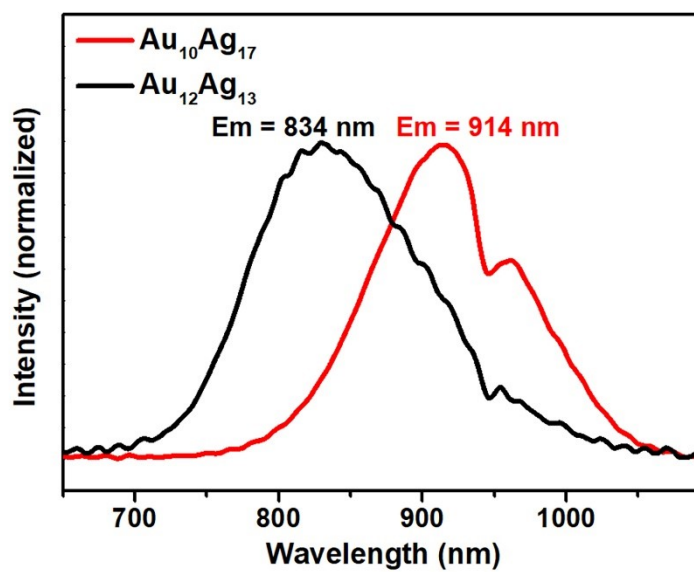

**Fig. S17** Normalized photoluminescence spectra of the  $\text{Au}_{10}\text{Ag}_{17}$  (red,  $\lambda_{\text{ex}} = 405$  nm) and  $\text{Au}_{12}\text{Ag}_{13}$  (black,  $\lambda_{\text{ex}} = 405$  nm) nanoclusters in the solid state at room temperature.



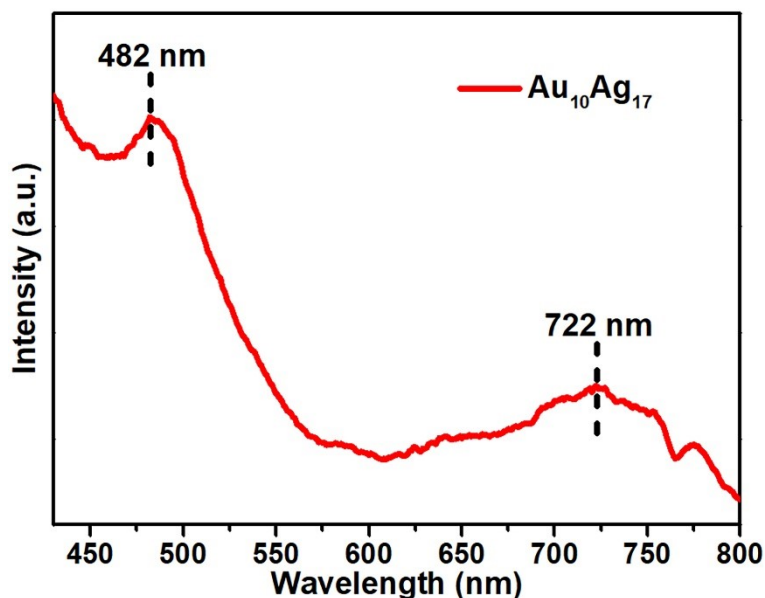

Fig. S18 PL excitation spectra of the  $\text{Au}_{10}\text{Ag}_{17}$  nanocluster.

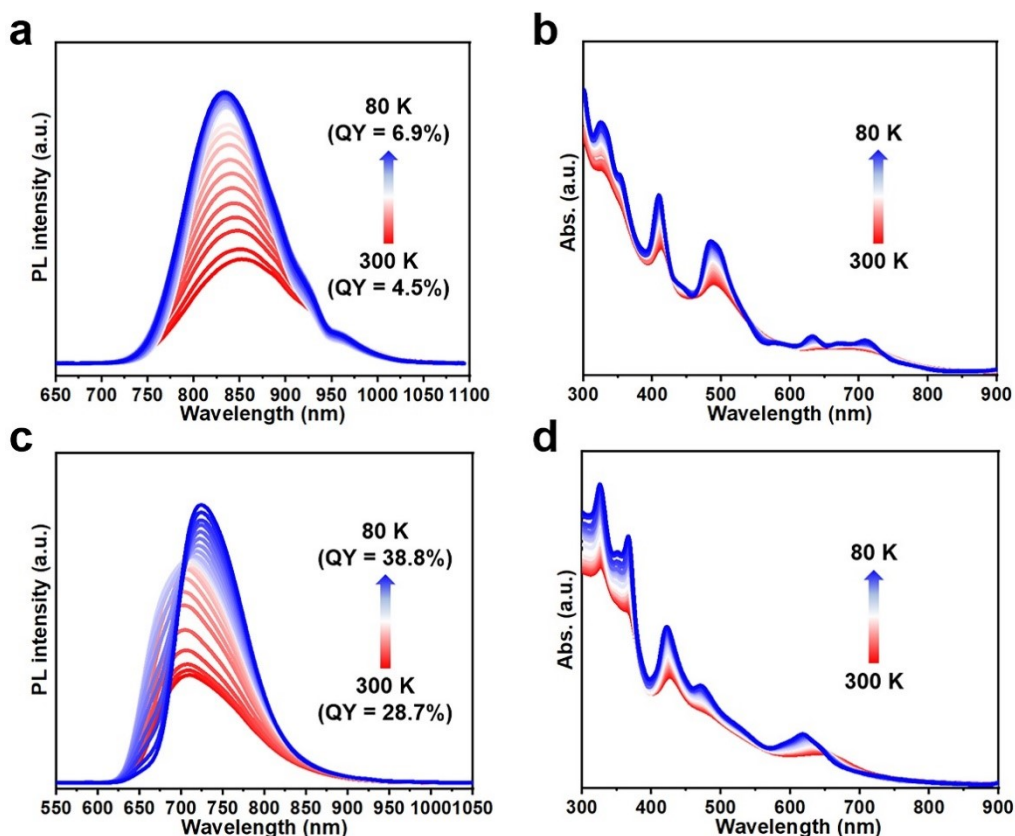

Fig. S19 Temperature-dependent PL spectra and UV-vis absorption spectra of  $\text{Au}_{10}\text{Ag}_{17}$  and  $\text{Au}_{12}\text{Ag}_{13}$  nanoclusters in 2-MeTHF (from 300 K to 80 K, monitored per 10 K). (a) Temperature-dependent PL spectra of  $\text{Au}_{10}\text{Ag}_{17}$  ( $\lambda_{\text{ex}} = 405$  nm, from 300 K to 80 K, monitored per 10 K). (b) Temperature-dependent UV-vis absorption spectra of  $\text{Au}_{10}\text{Ag}_{17}$ . (c) Temperature-dependent PL spectra of  $\text{Au}_{12}\text{Ag}_{13}$  in 2-MeTHF ( $\lambda_{\text{ex}} = 423$  nm, from 300 K to 80 K, monitored per 10 K). (d) Temperature-dependent UV-vis absorption spectra of

$\text{Au}_{12}\text{Ag}_{13}$

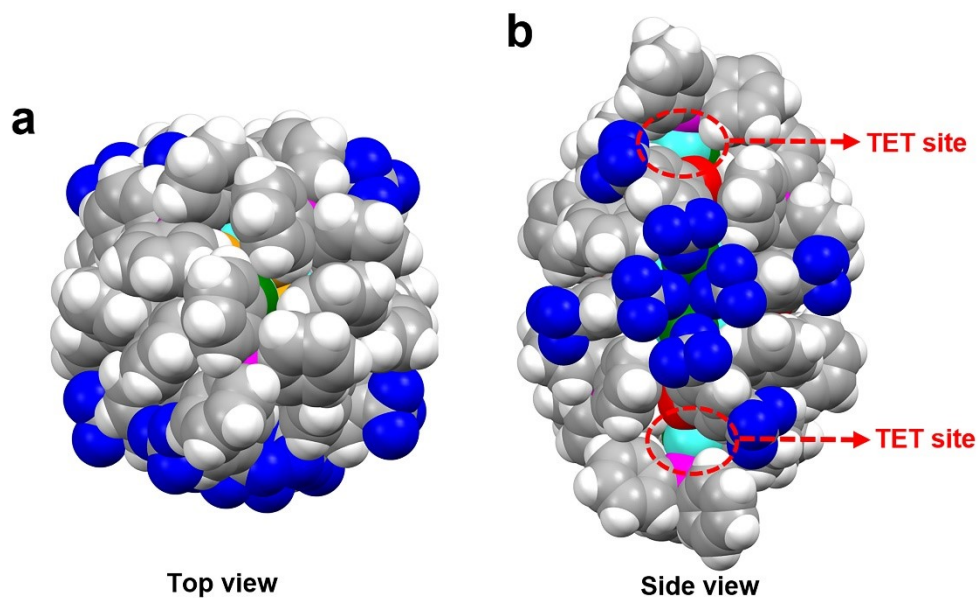

**Fig. S20** Geometrical structure (top view and side view) of  $\text{Au}_{10}\text{Ag}_{17}$ . Color labels: orange = Au; light blue = Ag; green = Cl; red = S; magenta = P; blue = F; grey = C; white = H.

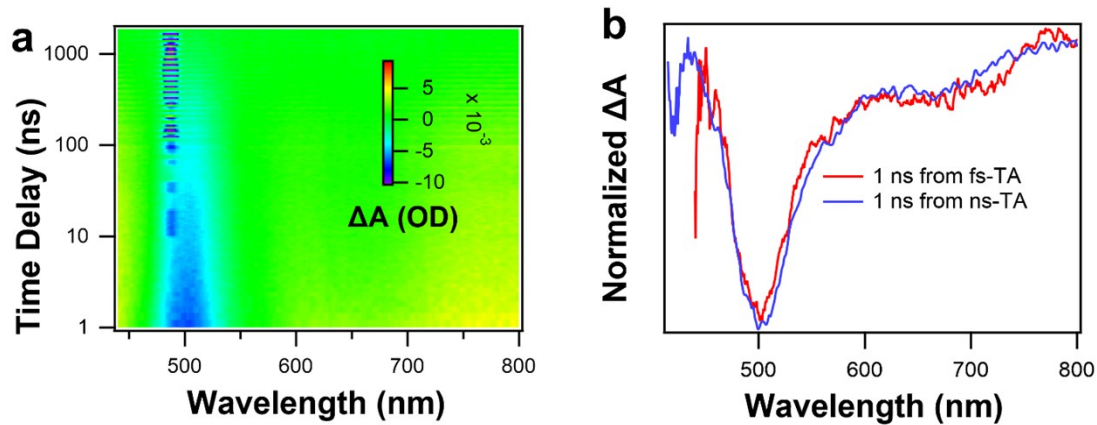

**Fig. S21** (a) ns-TA data map with 490 nm ex. (b) Comparison of TA spectra probed at 1 ns obtained from fs-TA and ns-TA measurements.
